# Supplementary material
Source: HighWire-hosted journal article supplement (https://www.annfammed.org/highwire/filestream/693/field_highwire_adjunct_files/0/Mullen_Supp_App.pdf)
Supplement: Mullen_Supp_App.pdf [file Mullen_Supp_App.pdf]

Supplemental materials for:

Mullen RA, Tong S, Sabo RT, Liaw WR, Marshall J, Nease, Jr DE, Krist AH, Frey III JJ. Loneliness in primary care patients: a prevalence study. *Ann Fam Med*. 2019;17(2):108-115.

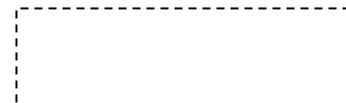

**Please complete this survey about the care you get at your doctor's office.**

**1. Age** \_\_\_\_\_ yrs **If you are under 18 or over 89 years of age, please do not finish the survey.**

**2. Gender:**  Male  Female

**3. Race / Ethnicity:** *check all that apply*

White  Hispanic  Black  Asian  Native American  Other

**4. The next questions are about how you feel about different aspects of your life. For each one, mark how often you feel that way? \***

|                                                    | Hardly ever | Some of the time | Often |
|----------------------------------------------------|-------------|------------------|-------|
| How often do you feel that you lack companionship? |             |                  |       |
| How often do you feel left out?                    |             |                  |       |
| How often do you feel isolated from others?        |             |                  |       |

\*If any of these are a concern for you, please let your doctor know at your appointment today.

**5. In general, would you say that your health is -- ?** *check one*

- Excellent
- Very good
- Good
- Fair
- Poor

**6. During the past 30 days, for about how many days did poor physical or mental health keep you from doing your usual activities, such as self-care, work, or recreation?** *Write number of days*

\_\_\_

**7. Are you...?** *Check one*

- Employed, full time  Disabled  Unemployed
- Employed, part time  Retired  Prefer not to answer
- Homemaker  Student  Other (please list): \_\_\_\_\_

**8. What is the ZIP Code where you live?**

\_\_\_\_ - \_\_\_\_ - \_\_\_\_ - \_\_\_\_ - \_\_\_\_

**9. Are you....?** *check one*

- Married                       Separated                       In a relationship  
 Divorced                       Never married                       Prefer not to answer  
 Widowed

**10a. In the past year, how many times have you visited...?** *Please write a number*

- a. Urgent Care/Emergency Room: \_\_\_\_  
b. Your Primary Care Doctor's Office: \_\_\_\_

**10 b. In the past year, how many times have you been hospitalized?** *Please write a number*

\_\_\_\_

***Thank you for your time. Please return this form as directed.***
